# Supplementary material
Source: PubMed Central journal article supplement (PMC5860878)
Supplement: NIHMS950352-supplement-Supplemental_Figures.pdf [file NIHMS950352-supplement-Supplemental_Figures.pdf]

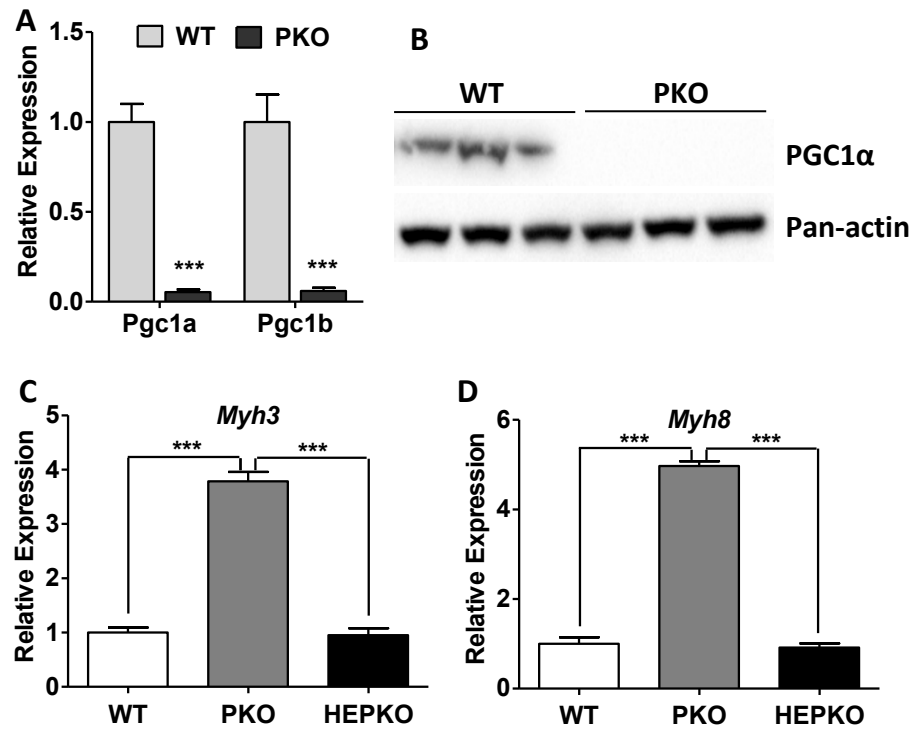

**Figure S1 (related to Fig. 1).** ERR $\gamma$  improves running defect and muscle damage in PGC1-null mice. (A) Relative RNA expression levels of *Pgc1a* and *Pgc1b* in WT vs PKO plantaris; (B) Western blot showing *Pgc1a* and actin protein levels in WT vs PKO soleus; (C-D) Relative RNA expression levels of *Myh3* (C) and *Myh8* (D) in plantaris. (n=5, \*\*\*p < 0.001)

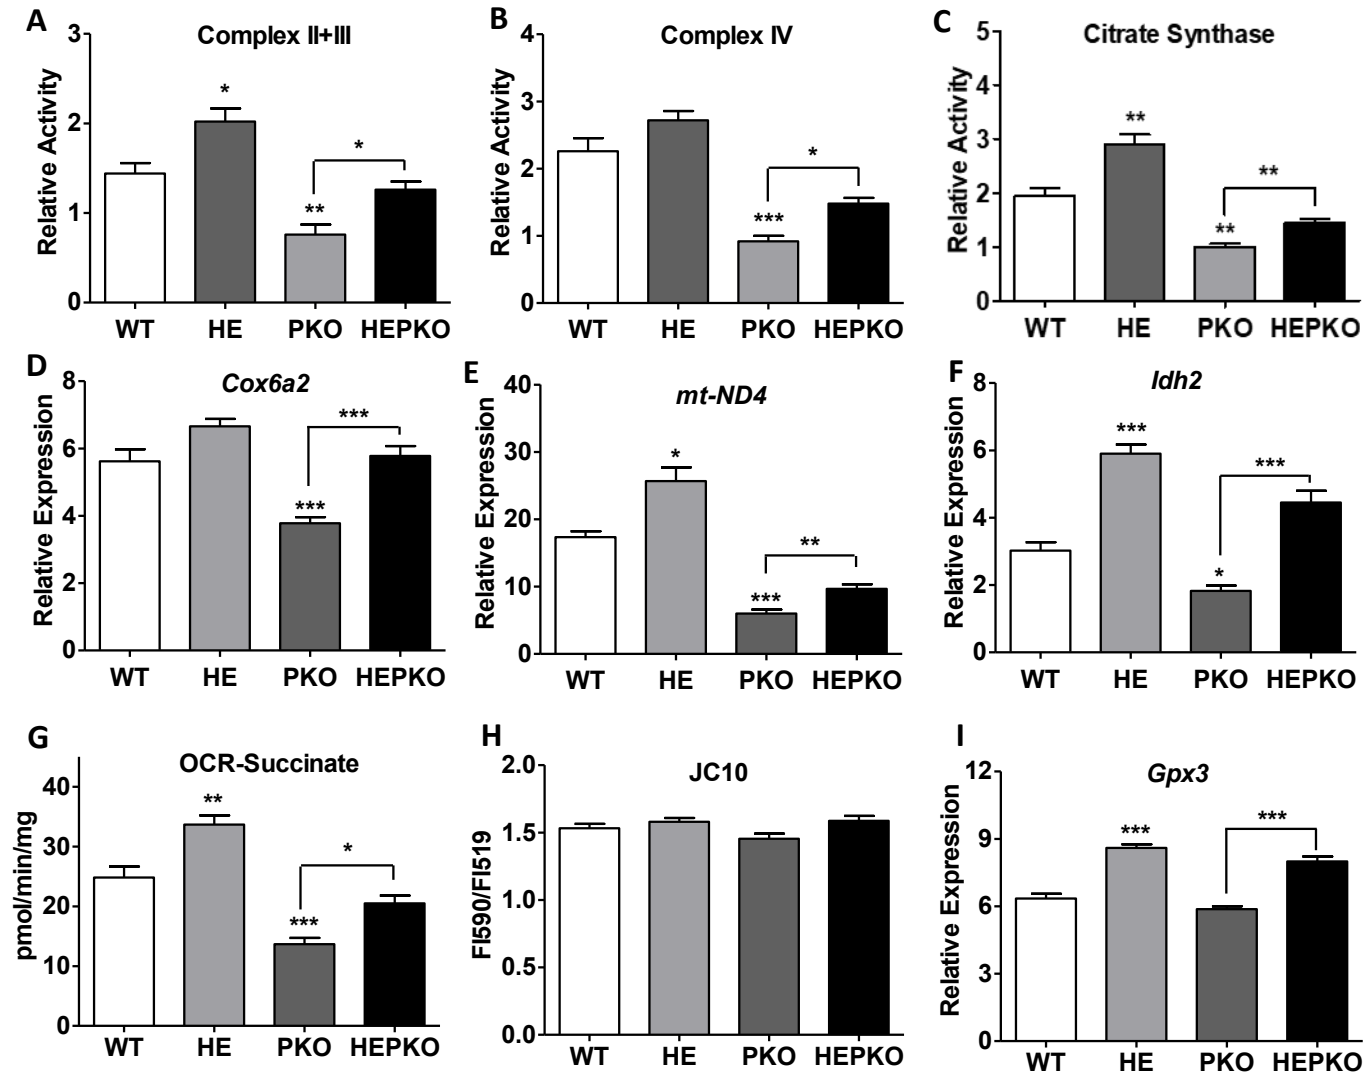

**Figure S2 (related to Fig. 2).** ERR $\gamma$  improves mitochondrial energetic defects in PGC1-null muscle. (A-C) mitochondrial complex II+III activity (A), complex IV activity (B), and citrate synthase activity (C) measured in isolated mitochondrial from quadriceps muscle; (D-F) RNA expression levels of *Cox6a2* (D), *mt-Nd4* (E), and *Idh2* (F) in plantaris; (G) oxygen consumption rate measured in freshly isolated quadriceps mitochondria using succinate as substrate; (H) mitochondrial membrane potential measured as JC-10 fluorescence intensity ratio at 590nm/519nm in freshly isolated quadriceps mitochondria; and (I) RNA expression of *Gpx3* in plantaris. (n=5; \*p < 0.05, \*\*p < 0.01, \*\*\*p < 0.001)

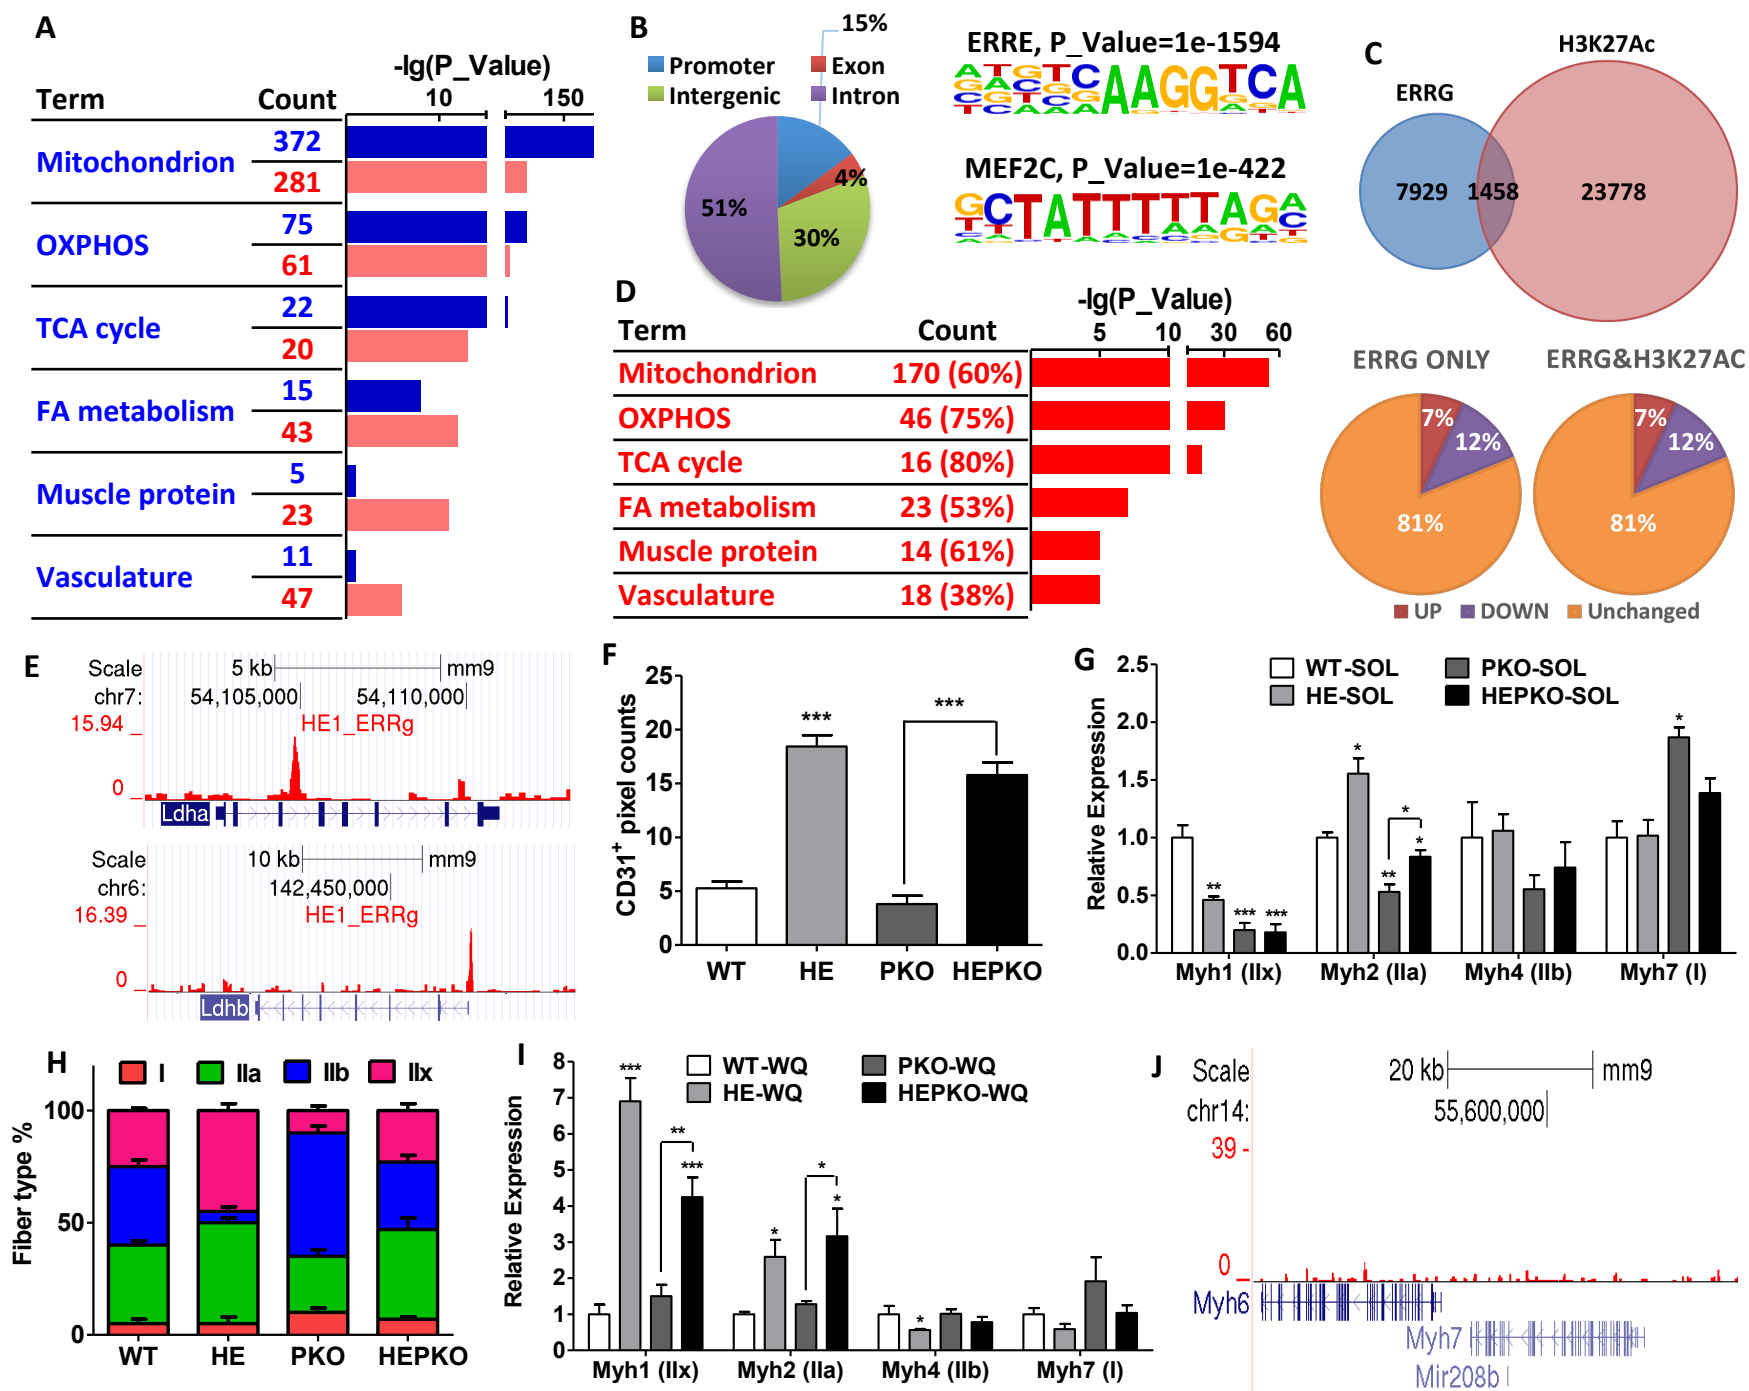

**Figure S3 (related to Fig. 3).** ERR $\gamma$  induces oxidative muscle remodeling in the absence of PGC1. (A) Gene ontology analyses of down-regulated (blue) genes in PKO vs WT SOL and up-regulated (red) genes in HE vs WT WQ muscle; (B) schematic showing genomic distribution of ERR $\gamma$ -bound peaks (left) and a consensus ERRE and a MEF2c motif that are highly enriched in the ERR $\gamma$ -bound regions (right); (C) ERR $\gamma$ - and H3K27Ac-bound sites and sites co-occupied by both factors shown in Venn diagram (top), and the percentages of genes upregulated (purple), downregulated (blue), or unchanged (brown) by ERR $\gamma$  overexpression that contain ERR $\gamma$  binding sites or ERR $\gamma$ /H3K27Ac co-occupied sites (bottom); (D) gene ontology analyses of ERR $\gamma$ -bound and up-regulated genes in HE vs WT WQ muscle, with their percentages of total ERR $\gamma$ -induced genes in parentheses; (E) genome browser tracks showing ERR $\gamma$  binding at *Ldha* and *Ldhb*; (F) quantitative pixel counts in CD31 immunostaining (mean counts from 5 fields per section); (G) RNA expression of Myh1/2/4/7 in SOL; (H) quantitative fiber-typing analysis from Myh-immunostaining in Fig. 3D; (I) RNA expression of Myh1/2/4/7 in WQ; and (J) genome browser track showing no ERR $\gamma$  binding at the slow-twitch *Myh7* gene. (n=5; \*p < 0.05, \*\*p < 0.01, \*\*\*p < 0.001)

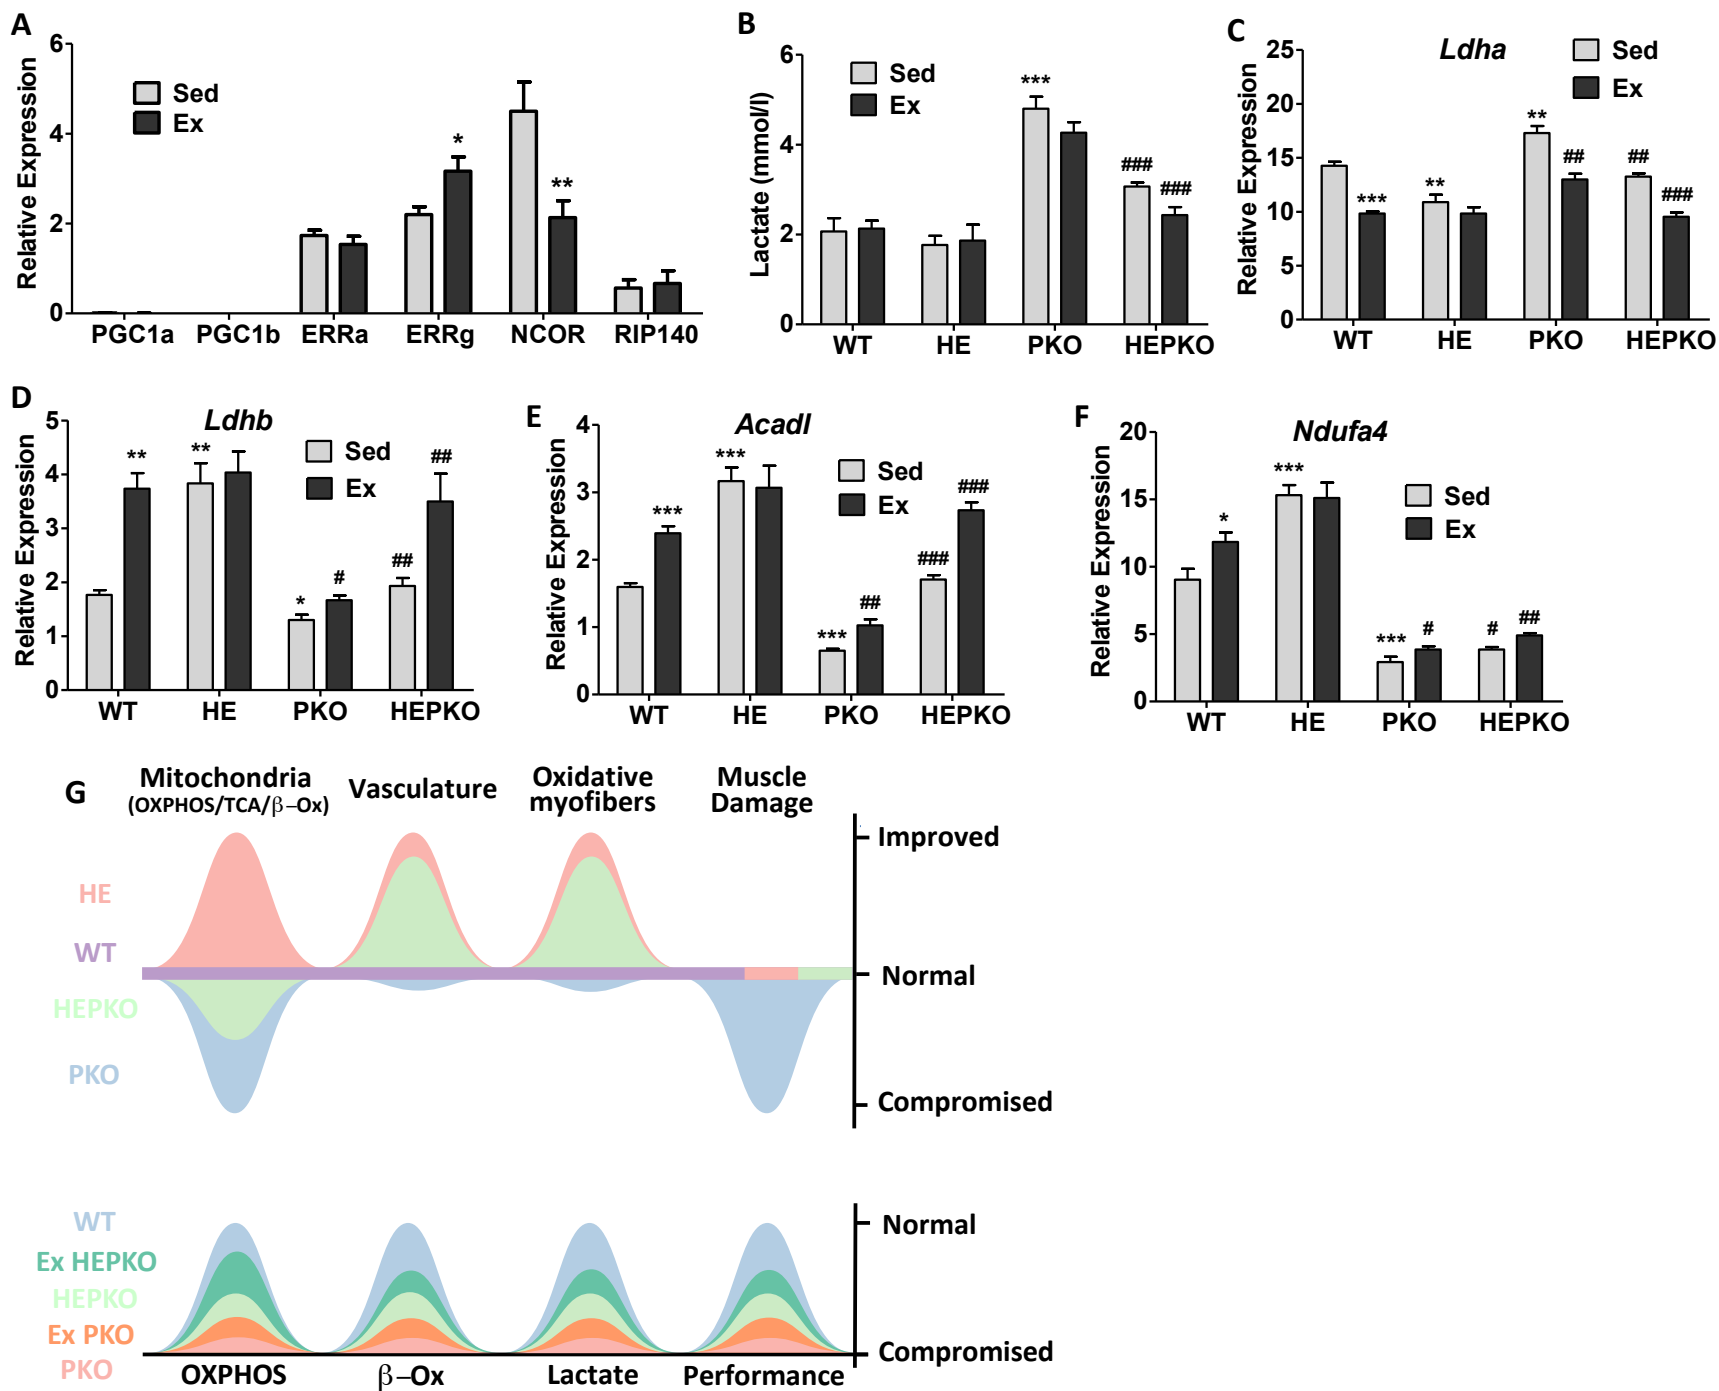

**Figure S4 (related to Fig. 4).** Exercise and  $ERR\gamma$  synergistically improve oxidative functions in PKO muscle. (A) RNA expression levels of PGC1a/b,  $ERR\alpha/g$ , NCOR, and RIP140 in PL muscle from sedentary vs exercised PKO mice; (B) Blood lactate level after 7 minutes of endurance running (when the first mouse failed); (C-F) RNA expression levels of *Ldha* (C), *Ldhb* (D), *Acadl* (E), and *Ndufa4* (F) in plantaris; and (G) schematic showing phenotypic changes in genetic models and combinational benefits of both  $ERR\gamma$  gain of function and voluntary exercise in PKO mice. (n=5; \* and # show statistical difference from WT and PKO, respectively. \* and # p < 0.05, \*\* and ## p < 0.01, \*\*\* and ### p < 0.001)
