# Supplementary material
Source: PubMed Central journal article supplement (PMC5860878)
Supplement: NIHMS950352-supplement-Supplemental_Figures_Table_S1.pdf [file NIHMS950352-supplement-Supplemental_Figures_Table_S1.pdf]

TABLE S1

| Rank | Motif | P-value   | % of Targets |
|------|-------|-----------|--------------|
| 1    |       | 1.0E-1594 | 41.82%       |
| 2    |       | 1.0E-422  | 16.15%       |
| 3    |       | 1.0E-181  | 35.61%       |
| 4    |       | 1.0E-124  | 13.05%       |
| 5    |       | 1.0E-123  | 14.49%       |
| 6    |       | 1.0E-102  | 2.68%        |
| 7    |       | 1.0E-64   | 3.00%        |
| 8    |       | 1.0E-49   | 18.85%       |
| 9    |       | 1.0E-46   | 2.71%        |
| 10   |       | 1.0E-37   | 3.29%        |

|                                                                |
|----------------------------------------------------------------|
| Best Match/Details                                             |
| MA0141.2_Esrrb/Jaspar(0.971)                                   |
| Mef2c(MADS)/GM12878-Mef2c-ChIP-Seq(GSE32465)/Homer(0.990)      |
| NF1-halfsite(CTF)/LNCaP-NF1-ChIP-Seq(Unpublished)/Homer(0.941) |
| Six1(Homeobox)/Myoblast-Six1-ChIP-Chip(GSE20150)/Homer(0.954)  |
| MA0089.1_NFE2L1::MafG/Jaspar(0.692)                            |
| GRE(NR/IR3)/A549-GR-ChIP-Seq(GSE32465)/Homer(0.973)            |
| BORIS(Zf)/K562-CTCF-ChIP-Seq(GSE32465)/Homer(0.965)            |
| Atoh1(bHLH)/Cerebellum-Atoh1-ChIP-Seq(GSE22111)/Homer(0.775)   |
| MA0025.1_NFIL3/Jaspar(0.899)                                   |
| KLF5(Zf)/LoVo-KLF5-ChIP-Seq(GSE49402)/Homer(0.743)             |
